# Supplementary material
Source: Royal Society of Chemistry journal article supplement (doi:10.1039/d6fo00325g)

Figure 3F

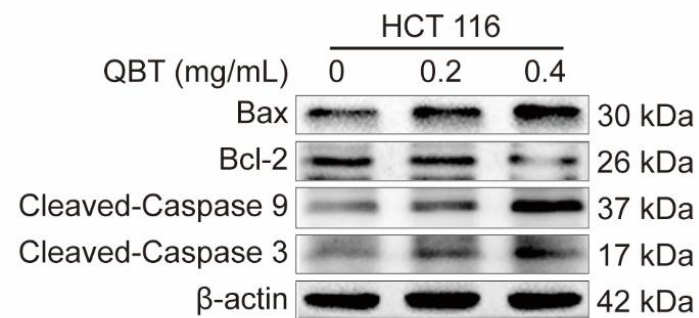

Bax

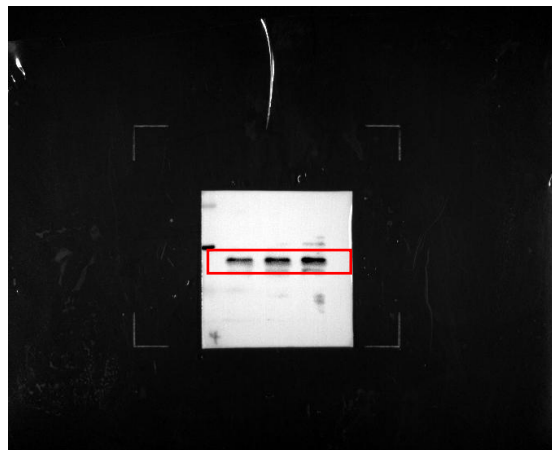

Bcl-2

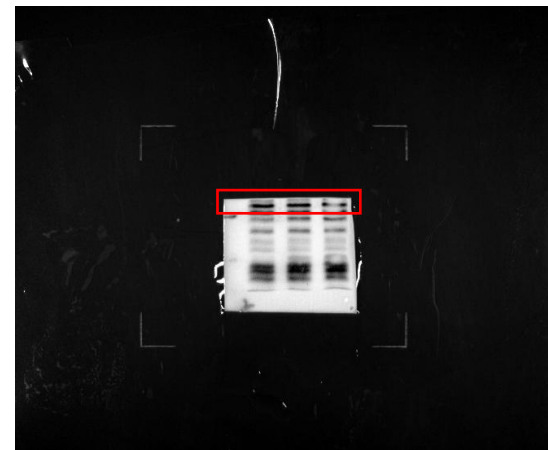

Cleaved-Caspase 9

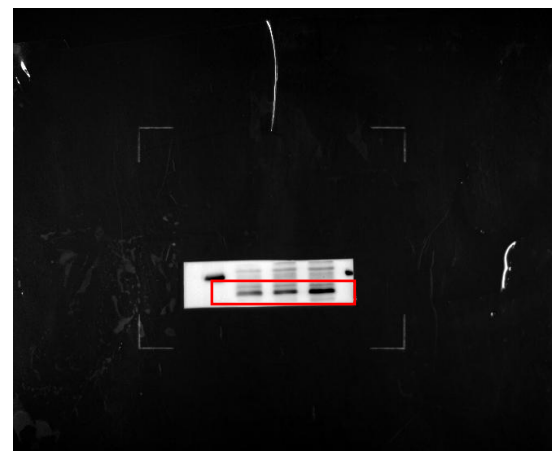

Cleaved-Caspase 3

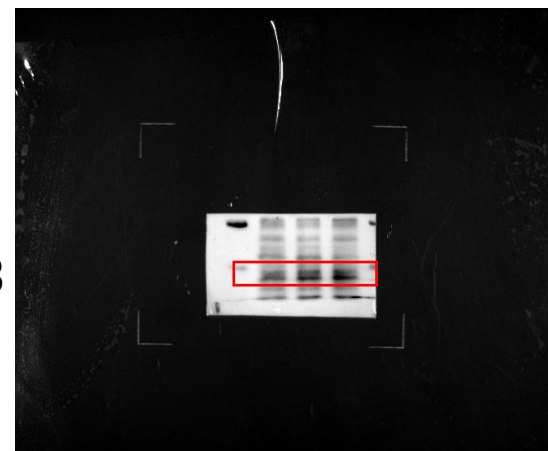

$\beta$ -actin

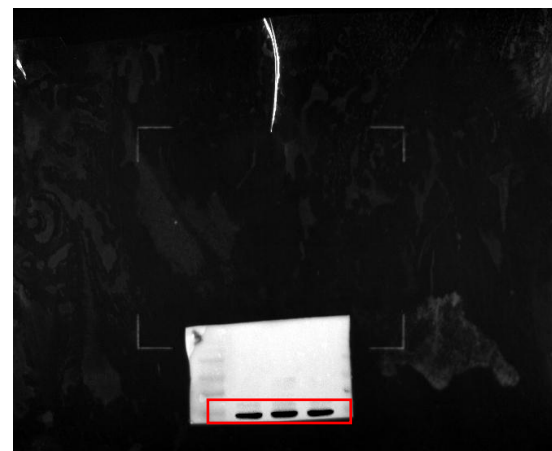

Figure 4A HCT116

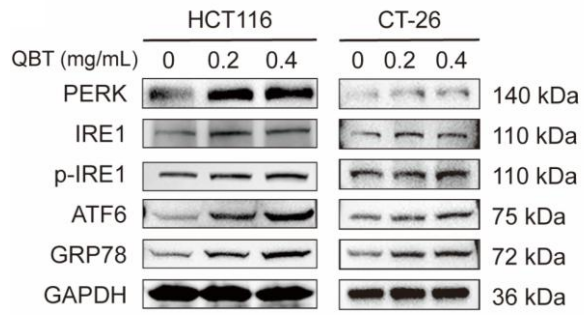

PERK

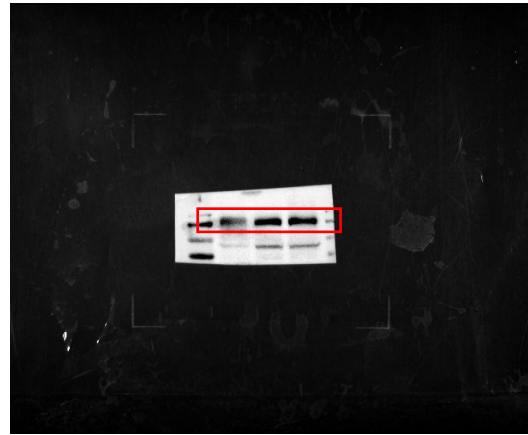

IRE1

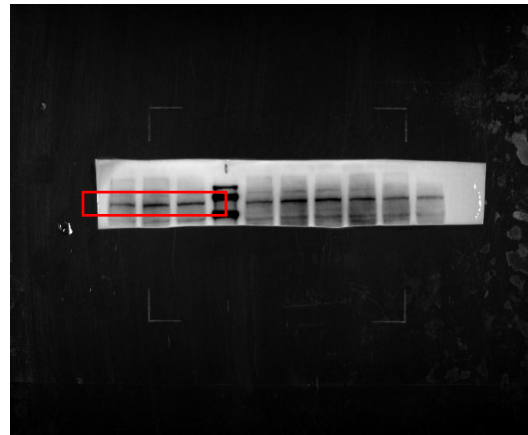

P-IRE1

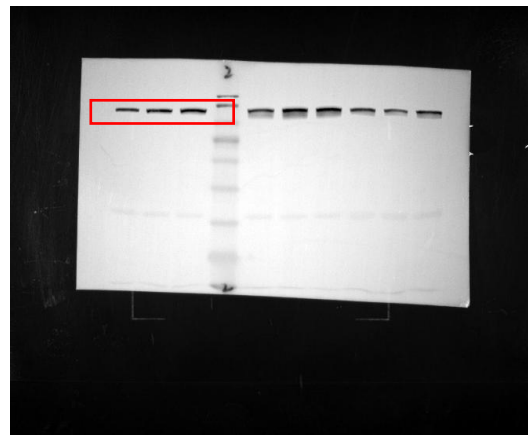

ATF6

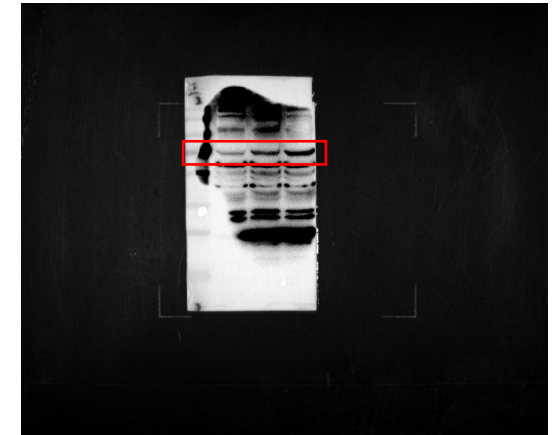

GRP78

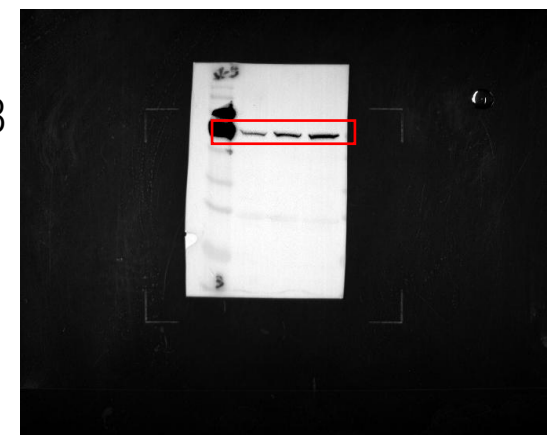

GAPDH

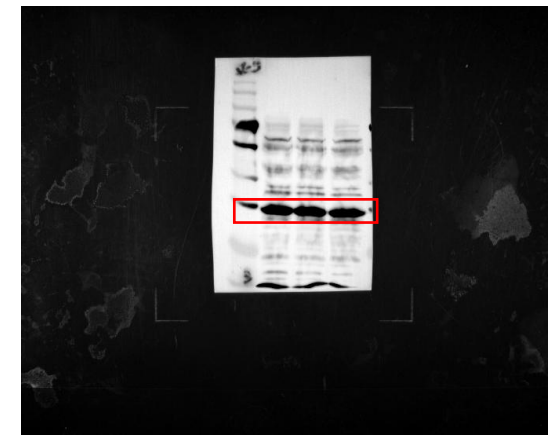

Figure 4A CT-26

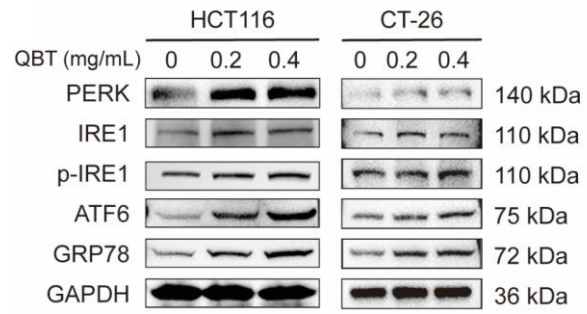

PERK

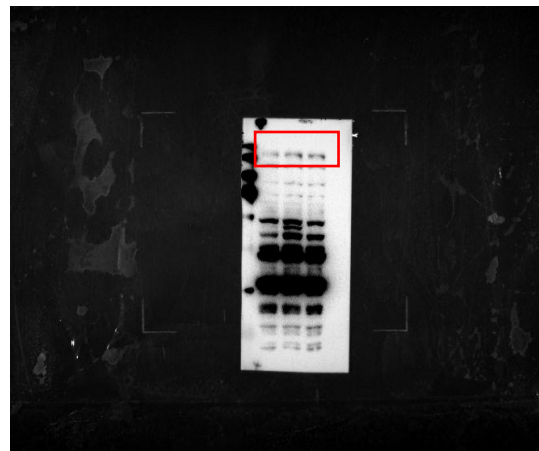

ATF6

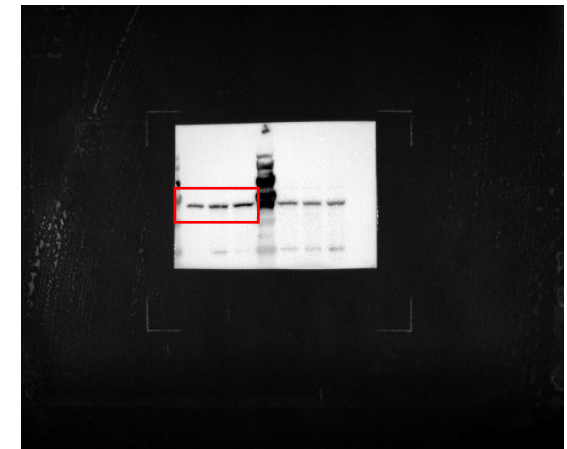

IRE1

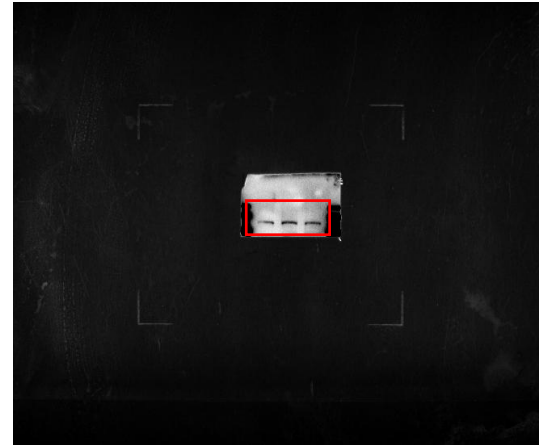

GRP78

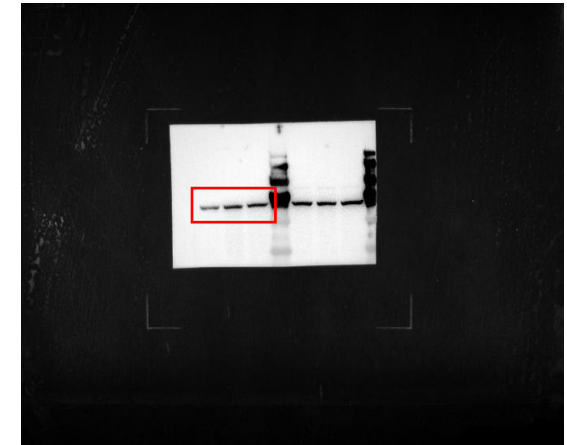

P-IRE1

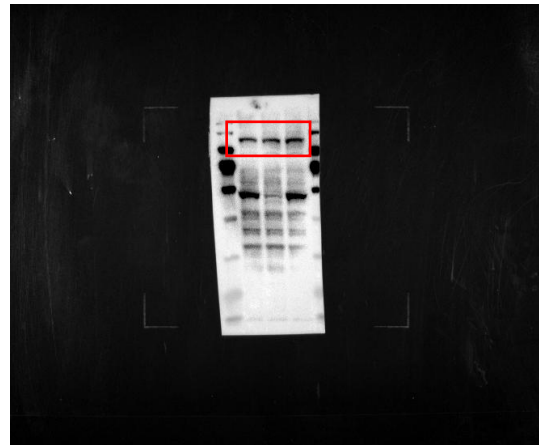

GAPDH

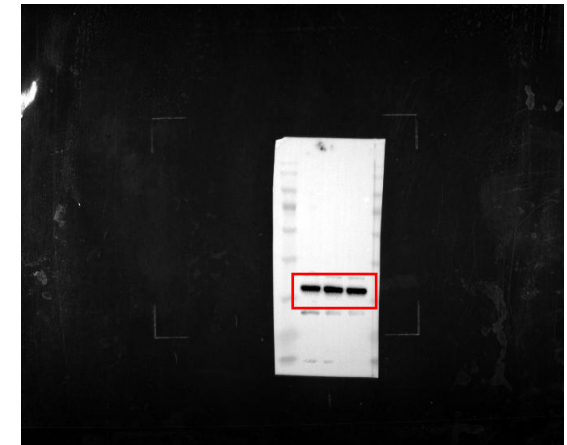

Figure 4G

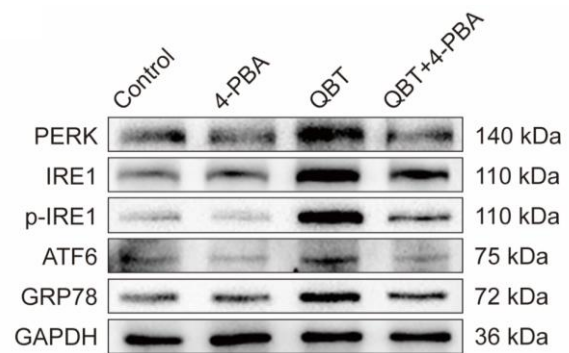

PERK

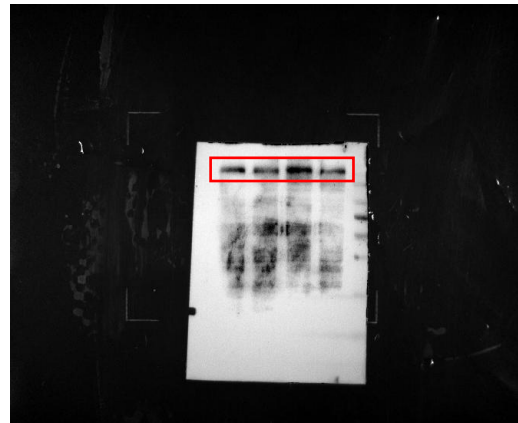

ATF6

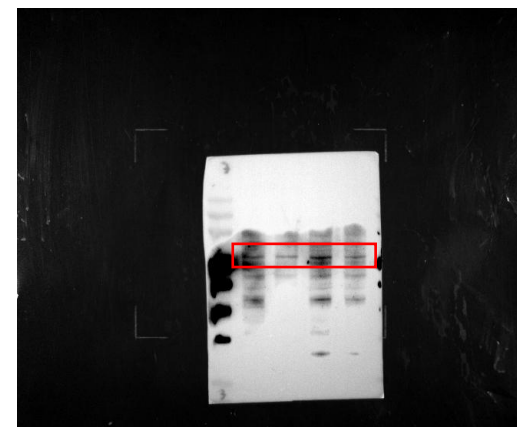

IRE1

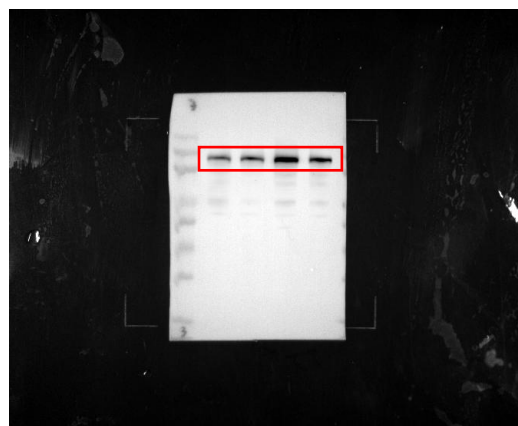

GRP78

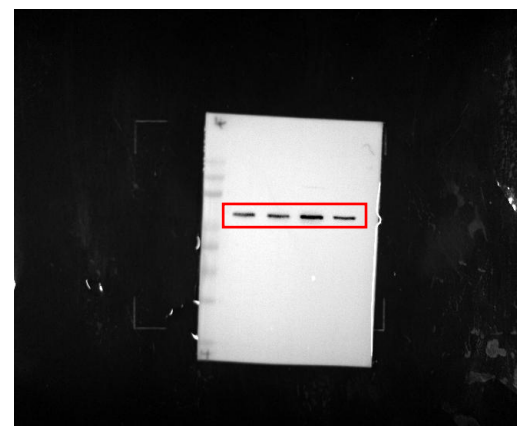

P-IRE1

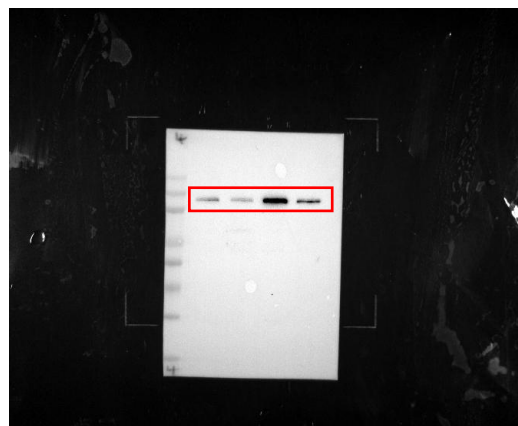

GAPDH

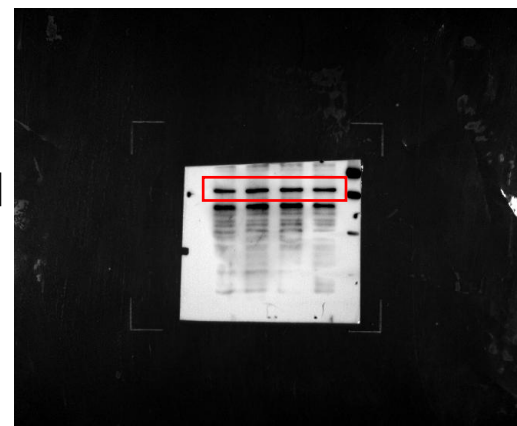

Supplement: d6fo00325g1.pdf [file d6fo00325g1.pdf]
